# Supplementary material for: Spermatocytes have the capacity to segregate chromosomes despite centriole duplication failure
Source: PubMed Central journal article supplement (PMC11316026; doi:10.1038/s44319-024-00187-6), 2024-06-28
Supplement: 44319_2024_187_MOESM1_ESM.pdf [file 44319_2024_187_MOESM1_ESM.pdf]

**Table of contents:**

Appendix Table S1: Genotyping primers used in this study.....2  
Appendix Table S2: Antibodies used in this study  
    Primary antibodies.....3  
    Secondary antibodies.....4  
Appendix Figure S1: Assessment of microtubule-associated factors during meiosis I.....5-8

Appendix Table S1: Genotyping primers used in this study

**Genotyping Primers**

| <b>Gene</b>                                                                               | <b>Forward Primer (5"-.....-3')</b> | <b>Reverse Primer (5"-.....-3')</b> |
|-------------------------------------------------------------------------------------------|-------------------------------------|-------------------------------------|
| <i>Plk4</i> <sup>WT</sup>                                                                 | TCTTGAGGGGAATTAGATAGCA              | TCACAGCTATTCTCACTCAGC               |
| <i>Plk4</i> <sup>fllox</sup>                                                              | GCCAGCCCCTCTAATCAGTC                | TCACAGCTATTCTCACTCAGC               |
| <i>Sas4</i> <sup>WT</sup>                                                                 | GGGAGCAGACTTCAACACT                 | GCTGACACCAAGTGGGAAAT                |
| <i>Sas4</i> <sup>fllox</sup>                                                              | TGCTTGCTTGCTCTCCTGA                 | GCTGACACCAAGTGGGAAAT                |
| <i>Plk1</i> <sup>WT</sup> , <i>Plk1</i> <sup>fllox</sup> , and <i>Plk1</i> <sup>del</sup> | AGTATGGCAGGCAGCATCTC                | ATGCTCCATGGAAAAGTCAGG               |
| <i>mCherry-Plk4</i> Transgene                                                             | AGGACGGCGAGTTCATCTAC                | TGGTGTAGTCCTCGTTGTGG                |
| <i>mCherry-Plk4</i> Internal Control                                                      | CAAATGTTGCTTGTCTGGTG                | GTCAGTCGAGTGCACAGTTT                |
| <i>Cre</i> Transgene                                                                      | CCATCTGCCACCAGCCAG                  | TCGCCATCTTCCAGCAGG                  |
| <i>Cre</i> Internal Control                                                               | ACTGGGATCTTCGAACTCTTTGGAC           | GATGTTGGGGCACTGCTCATTCCACC          |
| <i>Gdf9</i> <i>Cre</i> transgene                                                          | TCTGATGAAGTCAGGAAGAACC              | GAGATGTCCTTCACTCTGATTC              |

Appendix Table S2: Antibodies used in this study

| Antibody                 | Host   | Primary Antibodies           |             |             | IHC    |
|--------------------------|--------|------------------------------|-------------|-------------|--------|
|                          |        | Source                       | Cat. Number | IF Dilution |        |
| alpha-tubulin            | Mouse  | Sigma-Aldrich                | T9026       | 1:1000      |        |
| alpha-tubulin 4a         | Goat   | LS Bio                       | LS-C204216  | 1:100       |        |
| ARID2                    | Rabbit | Abclonal                     | A8601       | 1:100       |        |
| AURKA                    | Rabbit | Protein Tech Group           | 10297-1-AP  | 1:50        |        |
| AURKB                    | Rabbit | Abclonal                     | A19539      | 1:200       |        |
| beta-Catenin (12F7)      | Mouse  | Santa Cruz Biotech           | sc-59737    | 1:100       |        |
| CAMSAP1                  | Rabbit | Abclonal                     | A17839      | 1:100       |        |
| CAMSAP2                  | Rabbit | Protein Tech Group           | 17880-1-AP  | 1:200       |        |
| CAMSAP3                  | Mouse  | Dr. Masatoshi Takeichi       | NA          | 1:200       |        |
| CCDC13                   | Rabbit | Sigma Life Science           | HPA047429   | 1:500       |        |
| CDK5RAP2                 | Rabbit | Bethyl                       | IHC-00063   | 1:250       |        |
| CEP192                   | Goat   | Dr. Andrew Holland           | NA          | 1:1000      | 1:1000 |
| CEP164                   | Rabbit | Millipore Sigma              | ABE2621     | 1:1000      |        |
| Centrin                  | Rabbit | Dr. Andrew Holland           | NA          | 1:500       |        |
| Centrobin                | Rabbit | Abclonal                     | A8277       | 1:200       |        |
|                          |        |                              | H00001070-  |             |        |
| CETN3                    | Mouse  | Abnova                       | M01         | 1:200       |        |
| ch-TOG (CKAP5)           | Rabbit | Sigma-Aldrich                | HPA040375   | 1:200       |        |
| CLASP1                   | Rabbit | Abclonal                     | A7081       | 1:100       |        |
| Cleaved Caspase-3        | Rabbit | Cell Signaling Technology    | 9664 (5A1E) |             | 1:400  |
| delta-tubulin            | Rabbit | Abcam                        | ab214216    | 1:300       |        |
| Dynein                   | Mouse  | Genetex                      | GTX80684    | 1:300       |        |
|                          |        |                              | H00007802-  |             |        |
| Dynein (DYNALI1)         | Mouse  | Abnova                       | B01P        | 1:200       |        |
| Dynein (DYNLL1)          | Rabbit | Abclonal                     | A14496      | 1:100       |        |
| gamma-H2AX               | Mouse  | Thermo Scientific            | MA1-2022    | 1:500       |        |
| gamma-tubulin            | Mouse  | Sigma-Aldrich                | T6557       | 1:1000      | 1:500  |
| GCP2                     | Rabbit | Genetex                      | GTX102281   | 1:200       |        |
| GCP4                     | Rabbit | Genetex                      | GTX115949   | 1:100       |        |
| HAUS8                    | Rabbit | Abclonal                     | A7847       | 1:200       |        |
| HURP (DLGAP5)            | Rabbit | Abclonal                     | A13575      | 1:200       |        |
| KATNA1                   | Rabbit | Sigma-Aldrich                | HPA036207   | 1:100       |        |
| KATNAL1                  | Rabbit | Sigma-Aldrich                | ABE238      | 1:100       |        |
| KATNB1                   | Rabbit | Sigma-Aldrich                | HPA036207   | 1:100       |        |
| KIF2A                    | Rabbit | Abclonal                     | A16392      | 1:200       |        |
| KIF5B                    | Rabbit | Abclonal                     | A15284      | 1:100       |        |
| KIF11 (Eg5)              | Rabbit | Thomas Scientific            | HPA010568   | 1:300       |        |
| KIF18a                   | Rabbit | Abclonal                     | A14939      | 1:200       |        |
| KIFC1 (HSET)             | Rabbit | Abclonal                     | A0077       | 1:100       |        |
| mCherry                  | Mouse  | Biologend                    | 677701      | 1:500       |        |
| mCherry                  | Rabbit | Thermo Scientific            | PA5-34974   |             | 1:500  |
| MLH1                     | Mouse  | BD Biosciences               | 51-1327     | 1:100       |        |
| NEDD1                    | Mouse  | Abcam                        | ab57336     | 1:1000      |        |
| NuMA                     | Rabbit | Abcam                        | ab109262    | 1:100       |        |
| OFD-1                    | Rabbit | Abclonal                     | A17567      | 1:200       |        |
| PCNT                     | Rabbit | Abcam                        | ab4448      | 1:200       |        |
| PLK1                     | Rabbit | Genetex                      | GTX104302   | 1:200       |        |
| PLK4-01 AF-555 conjugate | Rabbit | Dr. Andrew Holland           | NA          | 1:300       | 1:300  |
| PNA-AF488 conjugate      | NA     | Molecular Probes (Life Tech) | L21409      | 1:500       | 1:500  |
| SYCP1                    | Rabbit | Thermo Scientific            | PA1-16763   | 1:100       |        |
| SYCP3                    | Mouse  | Santa Cruz Biotech           | sc-74569    | 1:50        | 1:300  |
| SYCP3                    | Rabbit | Novus Biologicals            | NB300-231   | 1:1000      |        |
| SYCP3                    | Goat   | Novus Biologicals            | AF3750      | 1:100       |        |
| TACC3                    | Rabbit | Novus Biologicals            | NBP2-67671  | 1:250       |        |
| TRAF3IP1                 | Rabbit | Abclonal                     | A8997       | 1:200       |        |
| TPX2                     | Rabbit | Abclonal                     | A18327      | 1:100       |        |
| USP24                    | Rabbit | Abclonal                     | A0621       | 1:100       |        |

**Secondary Antibodies**

| <b>Antibody</b>                  | <b>Host</b> | <b>Source</b> | <b>Cat. Number</b> | <b>IF Dilution</b> | <b>IHC</b> |
|----------------------------------|-------------|---------------|--------------------|--------------------|------------|
| Goat IgG (H+L) Alexa Fluor 488   | Donkey      | Invitrogen    | A-11055            | 1:500              | 1:3000     |
| Goat IgG (H+L) Alexa Fluor 568   | Donkey      | Invitrogen    | A-11057            | 1:500              | 1:3000     |
| Goat IgG (H+L) Alexa Fluor 633   | Donkey      | Invitrogen    | A-21082            | 1:500              | 1:3000     |
| Rabbit IgG (H+L) Alexa Fluor 488 | Donkey      | Invitrogen    | A-110018           | 1:500              | 1:3000     |
| Rabbit IgG (H+L) Alexa Fluor 568 | Donkey      | Invitrogen    | A-11011            | 1:500              | 1:3000     |
| Rabbit IgG (H+L) Alexa Fluor 647 | Donkey      | Invitrogen    | A-31573            | 1:500              | 1:3000     |
| Mouse IgG (H+L) Alexa Fluor 488  | Donkey      | Invitrogen    | A-11001            | 1:500              | 1:3000     |
| Mouse IgG (H+L) Alexa Fluor 568  | Donkey      | Invitrogen    | A-11031            | 1:500              | 1:3000     |
| Mouse IgG (H+L) Alexa Fluor 647  | Donkey      | Invitrogen    | A-31571            | 1:500              | 1:3000     |

Appendix Figure S1: Assessment of microtubule associated factors during meiosis I

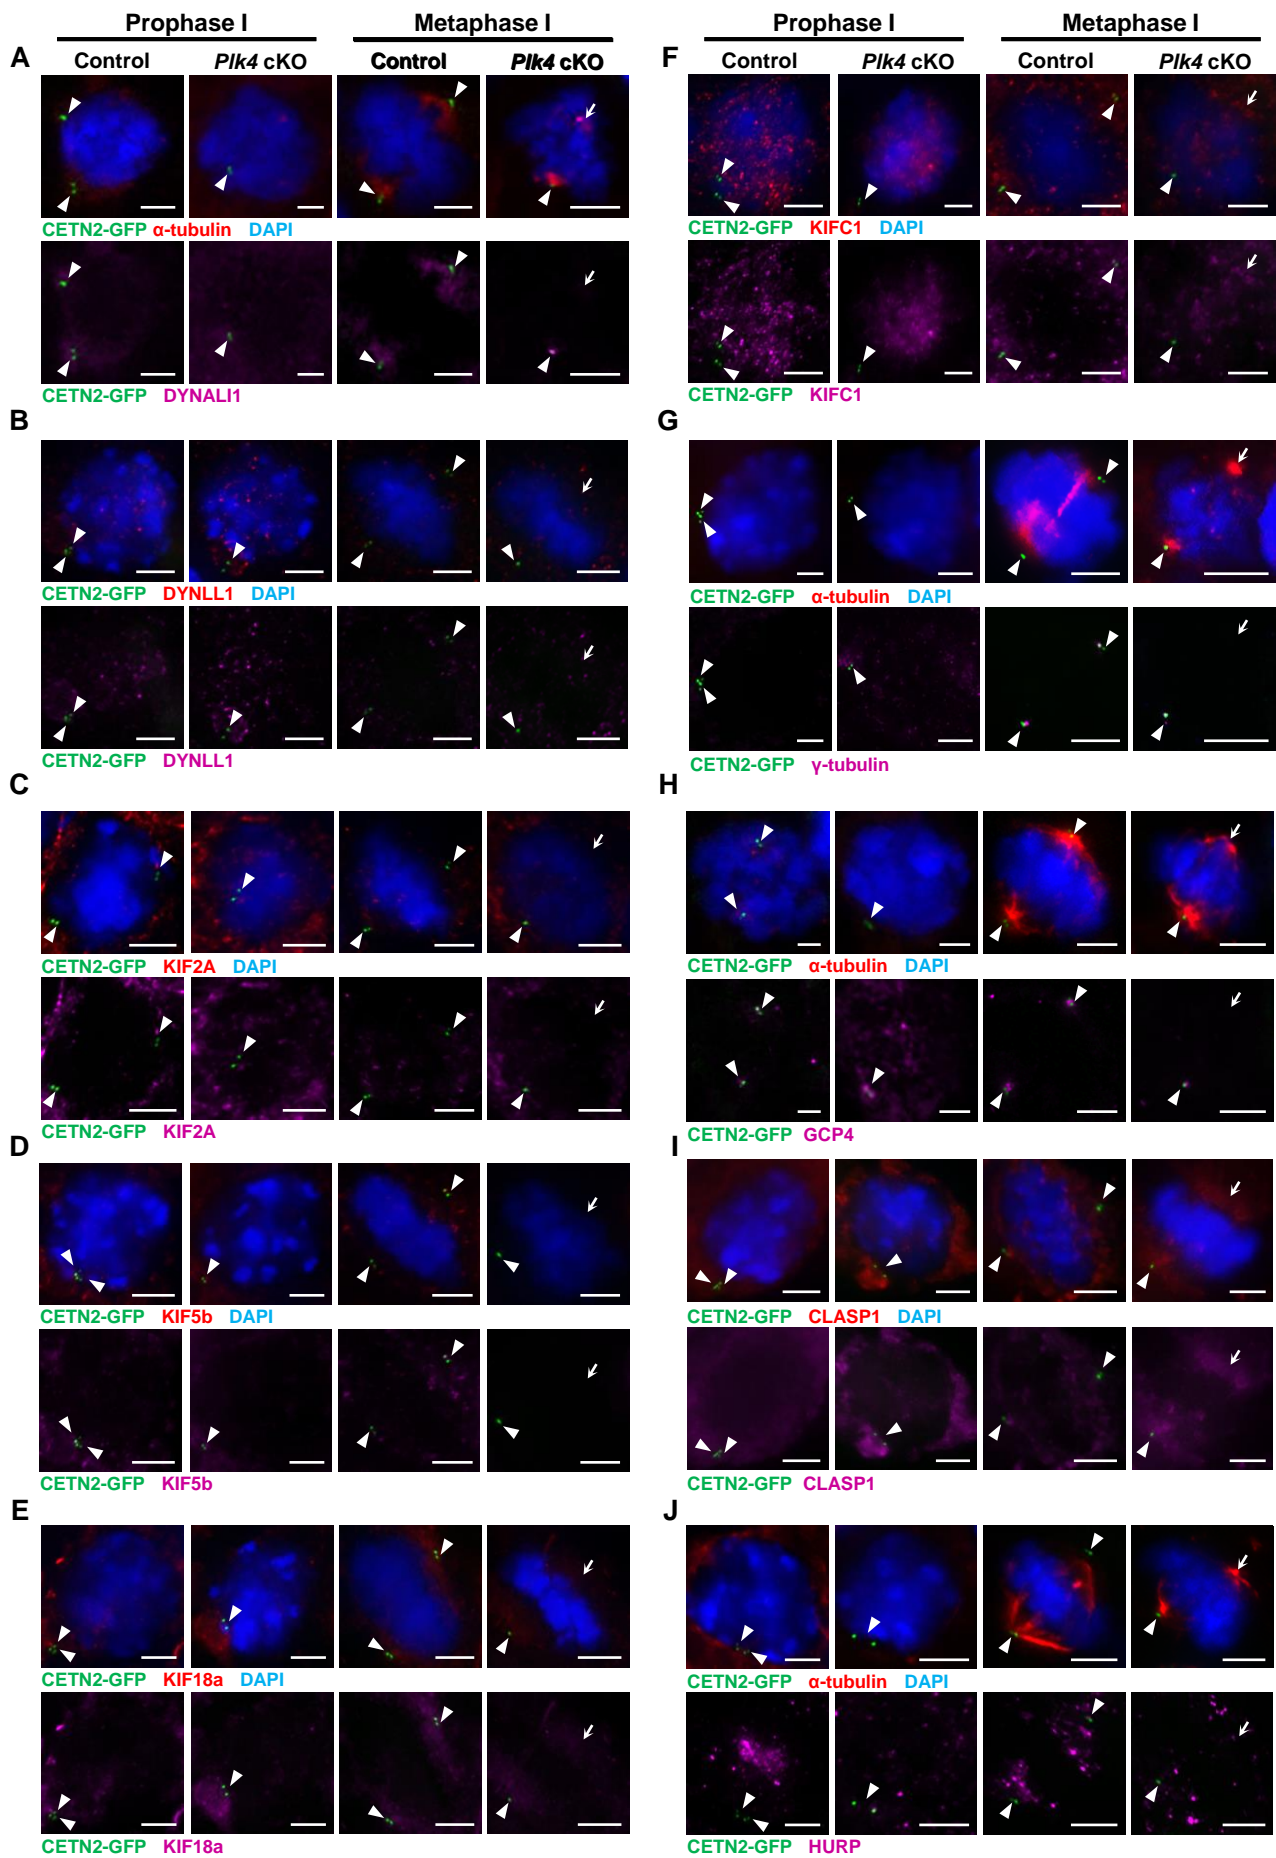

Appendix Figure S1: Assessment of microtubule associated factors during meiosis I

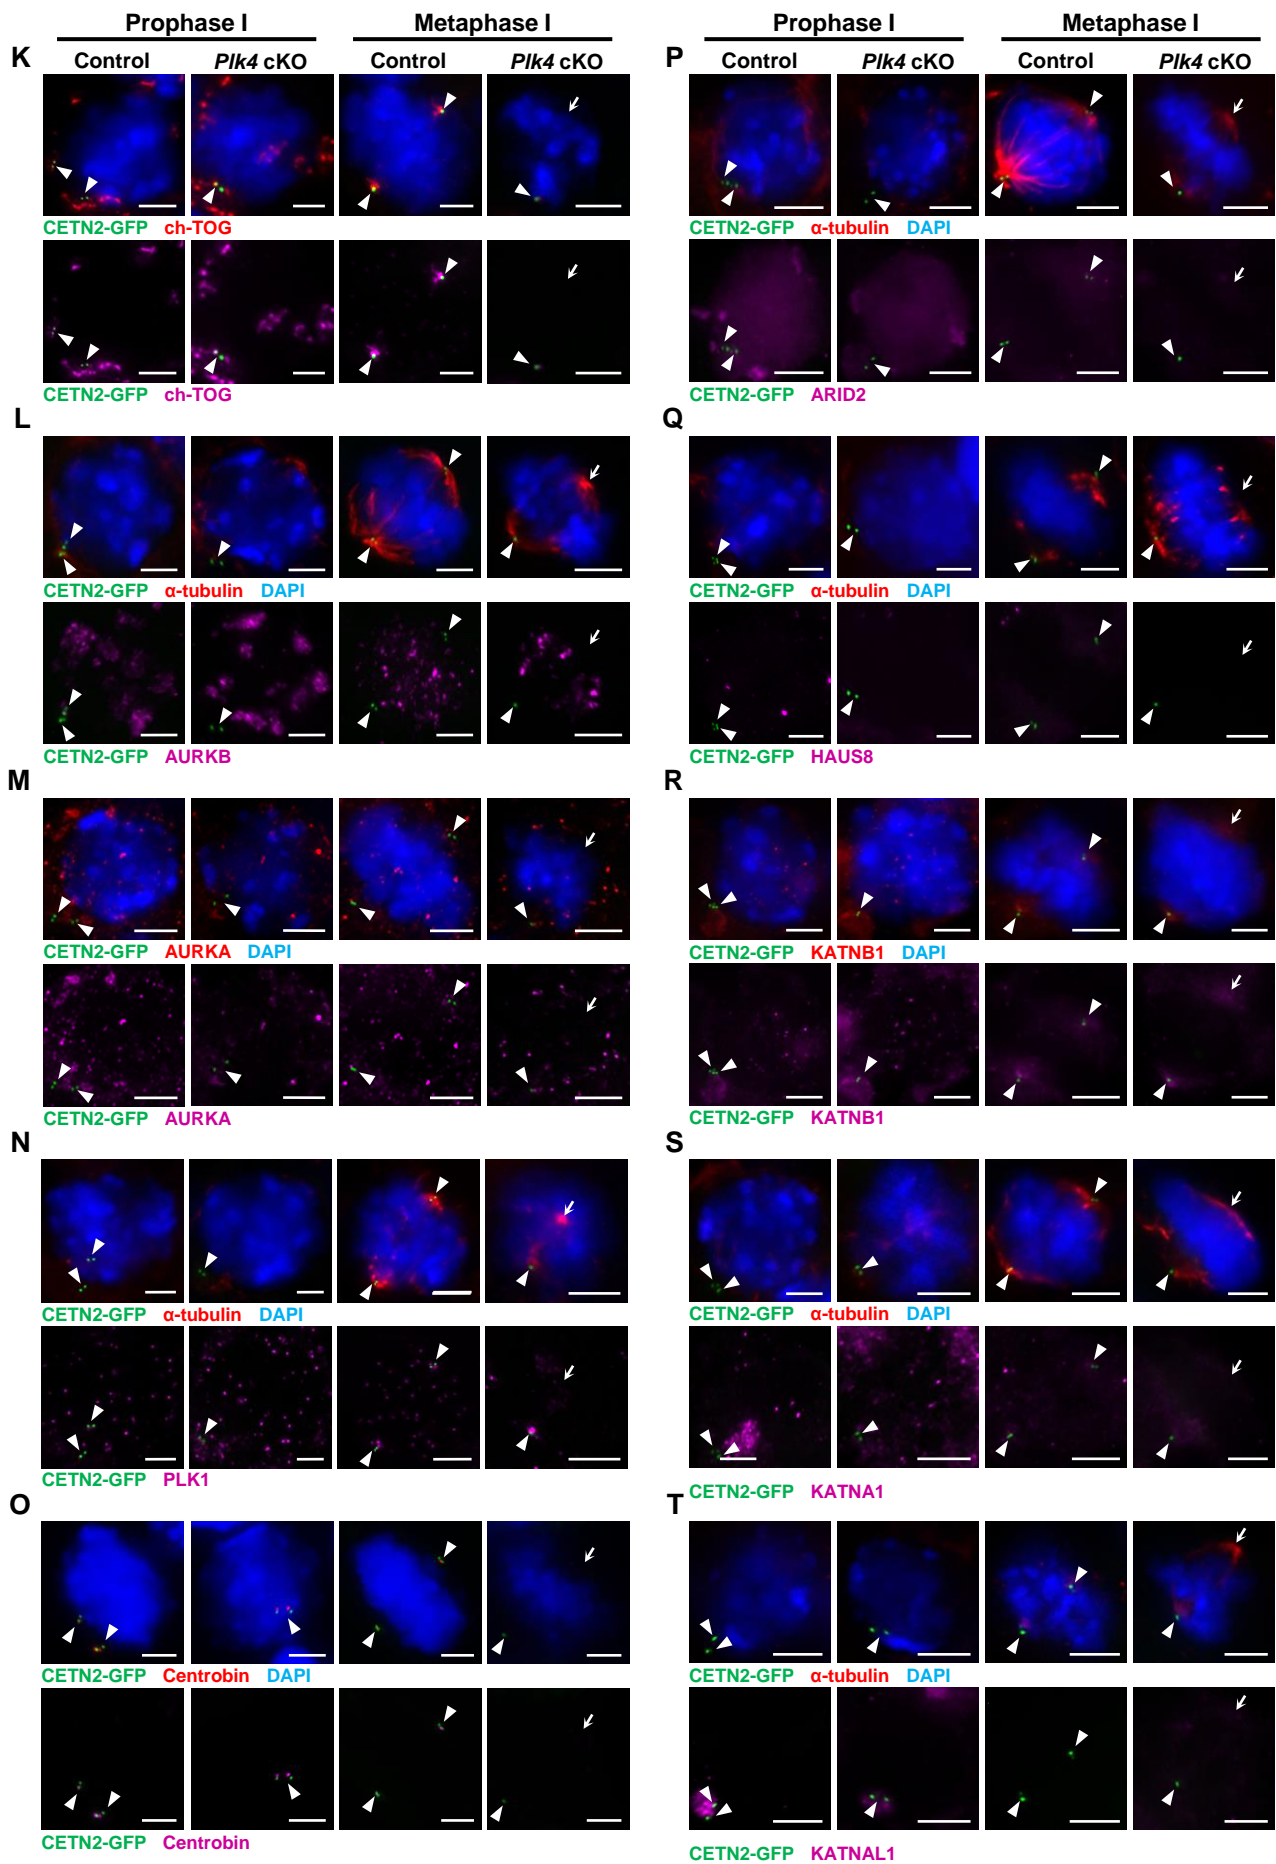

Appendix Figure S1: Assessment of microtubule associated factors during meiosis I

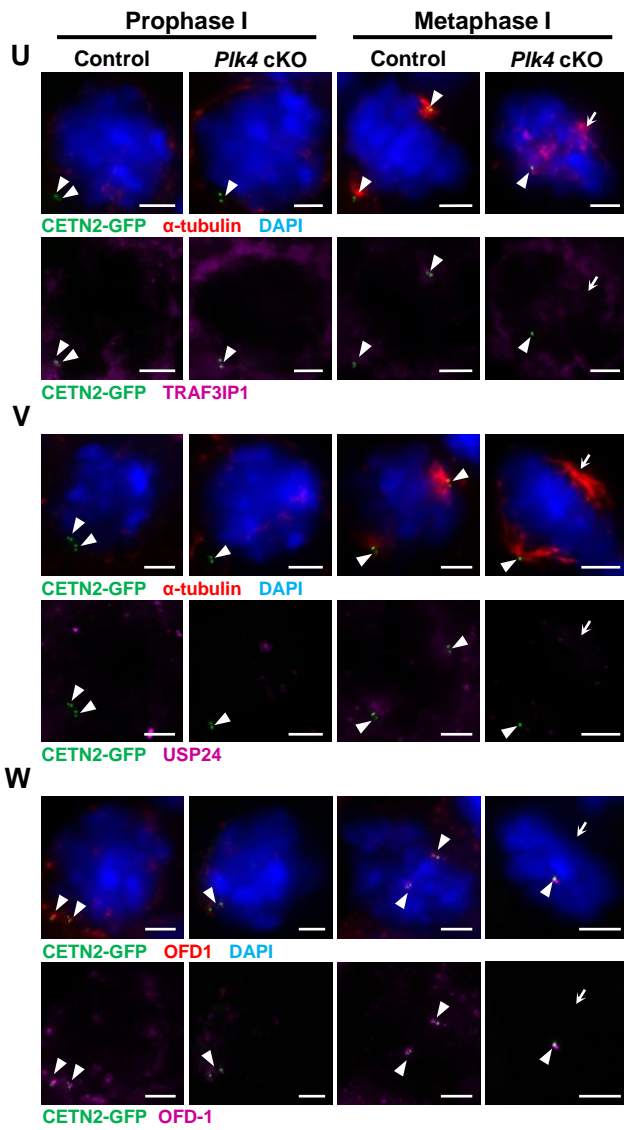

**Figure EV4. Assessment of microtubule-associated factors during meiosis I.**

Representative image of prophase I (A-W) and metaphase I (A-W) control and *Plk4* cKO spermatocytes from 24-27 dpp mice expressing CETN2-GFP (green) and stained with DAPI (blue). The white arrowheads indicate the centrosome. The white arrows indicate. Scale bars = 5  $\mu$ m.

- A. Immunolabeled against  $\alpha$ -tubulin (red) and DYNALI1 (purple).
- B. Immunolabeled against DYNLL1 (red and purple).
- C. Immunolabeled against KIF2A (red and purple).
- D. Immunolabeled against KIF5b (red and purple).
- E. Immunolabeled against KIF18a (red and purple).
- F. Immunolabeled against KIFC1 (red and purple).
- G. Immunolabeled against  $\alpha$ -tubulin (red) and  $\gamma$ -tubulin (purple).
- H. Immunolabeled against  $\alpha$ -tubulin (red) and GCP4 (purple).
- I. Immunolabeled against CLASP1 (red and purple).
- J. Immunolabeled against  $\alpha$ -tubulin (red) and HURP (purple).
- K. Immunolabeled against ch-TOG (red and purple).
- L. Immunolabeled against  $\alpha$ -tubulin (red) and AURKB (purple).
- M. Immunolabeled against AURKA (red and purple).
- N. Immunolabeled against  $\alpha$ -tubulin (red) and PLK1 (purple).
- O. Immunolabeled against centrobilin (red and purple).
- P. Immunolabeled against  $\alpha$ -tubulin (red) and ARID2 (purple).
- Q. Immunolabeled against  $\alpha$ -tubulin (red) and HAUS8 (purple).
- R. Immunolabeled against KATNB1 (red and purple).
- S. Immunolabeled against  $\alpha$ -tubulin (red) and KATNA1 (purple).
- T. Immunolabeled against  $\alpha$ -tubulin (red) and KATNAL1 (purple).
- U. Immunolabeled against  $\alpha$ -tubulin (red) and TRAF3IP1 (purple).
- V. Immunolabeled against  $\alpha$ -tubulin (red) and USP24 (purple).
- W. Immunolabeled against OFD1 (red and purple).
