# Supplementary material for: Spermatocytes have the capacity to segregate chromosomes despite centriole duplication failure
Source: PubMed Central journal article supplement (PMC11316026; doi:10.1038/s44319-024-00187-6), 2024-06-28
Supplement: 44319_2024_187_MOESM2_ESM.pdf [file 44319_2024_187_MOESM2_ESM.pdf]

# Spermatocytes have the capacity to segregate chromosomes despite centriole duplication failure

Marnie Skinner, Carter Simington, Pablo López-Jiménez, Kerstin Baran, Jingwen Xu, Yaron Dayani, Marina Pryzhkova, Jesús Page, Rocio Gomez, Andrew Holland, and Philip Jordan

Corresponding author: Philip Jordan ([pjordan8@jhu.edu](mailto:pjordan8@jhu.edu))

---

## Review Timeline:

|                     |             |
|---------------------|-------------|
| Submission Date:    | 12th Dec 23 |
| Editorial Decision: | 23rd Jan 24 |
| Revision Received:  | 22nd May 24 |
| Editorial Decision: | 12th Jun 24 |
| Revision Received:  | 13th Jun 24 |
| Accepted:           | 14th Jun 24 |

---

Editor: Esther Schnapp

## Transaction Report:

(Note: With the exception of the correction of typographical or spelling errors that could be a source of ambiguity, letters and reports are not edited. Depending on transfer agreements, referee reports obtained elsewhere may or may not be included in this compilation. Referee reports are anonymous unless the Referee chooses to sign their reports.)

Dear Phil,

Thank you for your patience while your manuscript was peer-reviewed at EMBO reports. We have now received the full set of referee reports that is pasted below.

As you will see, while referee 3 is concerned about the limited novelty of the findings, both referees 1 and 2 acknowledge that the data are interesting and a good fit for our journal. However, we also agree with referee 1 that some more data/insight into how spindle pole formation or microtubule nucleation occurs at centriole-free poles should be provided. We think that all referee suggestions are good and should be addressed. Please let me know in case you disagree, and we can discuss the exact revision requirements further, also in a video chat, if you like.

I would thus like to invite you to revise your manuscript with the understanding that the referee concerns must be fully addressed and their suggestions taken on board. Please address all referee concerns in a complete point-by-point response. Acceptance of the manuscript will depend on a positive outcome of a second round of review. It is EMBO reports policy to allow a single round of major revision only and acceptance or rejection of the manuscript will therefore depend on the completeness of your responses included in the next, final version of the manuscript.

We realize that it is difficult to revise to a specific deadline. In the interest of protecting the conceptual advance provided by the work, we recommend a revision within 3 months (24th Apr 2024). Please discuss the revision progress ahead of this time with the editor if you require more time to complete the revisions.

**IMPORTANT NOTE:** we perform an initial quality control of all revised manuscripts before re-review. Your manuscript will FAIL this control and the handling will be DELAYED if the following APPLIES:

- 1) A data availability section providing access to data deposited in public databases is missing. If you have not deposited any data, please add a sentence to the data availability section that explains that.
- 2) Your manuscript contains statistics and error bars based on  $n=2$ . Please use scatter blots in these cases. No statistics should be calculated if  $n=2$ .

When submitting your revised manuscript, please carefully review the instructions that follow below. Failure to include requested items will delay the evaluation of your revision.

1) a .docx formatted version of the manuscript text (including legends for main figures, EV figures and tables). Please make sure that the changes are highlighted to be clearly visible.

2) individual production quality figure files as .eps, .tif, .jpg (one file per figure). See [https://wol-prod-cdn.literatumonline.com/pb-assets/embo-site/EMBOPress\\_Figure\\_Guidelines\\_061115-1561436025777.pdf](https://wol-prod-cdn.literatumonline.com/pb-assets/embo-site/EMBOPress_Figure_Guidelines_061115-1561436025777.pdf) for more info on how to prepare your figures.

3) We replaced Supplementary Information with Expanded View (EV) Figures and Tables that are collapsible/expandable online. A maximum of 5 EV Figures can be typeset. EV Figures should be cited as 'Figure EV1, Figure EV2' etc... in the text and their respective legends should be included in the main text after the legends of regular figures.

- For the figures that you do NOT wish to display as Expanded View figures, they should be bundled together with their legends in a single PDF file called \*Appendix\*, which should start with a short Table of Content. Appendix figures should be referred to in the main text as: "Appendix Figure S1, Appendix Figure S2" etc. See detailed instructions regarding expanded view here: <https://www.embopress.org/page/journal/14693178/authorguide#expandedview>

- Additional Tables/Datasets should be labeled and referred to as Table EV1, Dataset EV1, etc. Legends have to be provided in a separate tab in case of .xls files. Alternatively, the legend can be supplied as a separate text file (README) and zipped together with the Table/Dataset file.

4) a .docx formatted letter INCLUDING the reviewers' reports and your detailed point-by-point responses to their comments. As part of the EMBO Press transparent editorial process, the point-by-point response is part of the Review Process File (RPF), which will be published alongside your paper.

5) a complete author checklist, which you can download from our author guidelines <https://www.embopress.org/page/journal/14693178/authorguide>. Please insert information in the checklist that is also reflected in the manuscript. The completed author checklist will also be part of the RPF.

6) Please note that all corresponding authors are required to supply an ORCID ID for their name upon submission of a revised manuscript (<https://orcid.org/>). Please find instructions on how to link your ORCID ID to your account in our manuscript tracking system in our Author guidelines <https://www.embopress.org/page/journal/14693178/authorguide#authorshipguidelines>

7) Before submitting your revision, primary datasets produced in this study need to be deposited in an appropriate public database (see <https://www.embopress.org/page/journal/14693178/authorguide#datadeposition>). Please remember to provide a reviewer password if the datasets are not yet public. The accession numbers and database should be listed in a formal "Data Availability" section placed after Materials & Method (see also <https://www.embopress.org/page/journal/14693178/authorguide#datadeposition>). Please note that the Data Availability Section is restricted to new primary data that are part of this study. \* Note - All links should resolve to a page where the data can be accessed. \*

If your study has not produced novel datasets, please mention this fact in the Data Availability Section.

8) At EMBO Press we ask authors to provide source data for the main manuscript figures. Our source data coordinator will contact you to discuss which figure panels we would need source data for and will also provide you with helpful tips on how to upload and organize the files.

9) Our journal also encourages inclusion of \*data citations in the reference list\* to directly cite datasets that were re-used and obtained from public databases. Data citations in the article text are distinct from normal bibliographical citations and should directly link to the database records from which the data can be accessed. In the main text, data citations are formatted as follows: "Data ref: Smith et al, 2001" or "Data ref: NCBI Sequence Read Archive PRJNA342805, 2017". In the Reference list, data citations must be labeled with "[DATASET]". A data reference must provide the database name, accession number/identifiers and a resolvable link to the landing page from which the data can be accessed at the end of the reference. Further instructions are available at <https://www.embopress.org/page/journal/14693178/authorguide#referencesformat>

10) Regarding data quantification (see Figure Legends:  
<https://www.embopress.org/page/journal/14693178/authorguide#figureformat>)

The following points must be specified in each figure legend:

- the name of the statistical test used to generate error bars and P values,
- the number (n) of independent experiments (please specify technical or biological replicates) underlying each data point,
- the nature of the bars and error bars (s.d., s.e.m.),
- If the data are obtained from n Program fragment delivered error ``Can't locate object method "less" via package "than" (perhaps you forgot to load "than"?) at //ejpvfs23/sites23b/embor\_www/letters/embor\_decision\_revise\_and\_review.txt line 56.' 2, use scatter blots showing the individual data points.

Discussion of statistical methodology can be reported in the materials and methods section, but figure legends should contain a basic description of n, P and the test applied.

- Please also include scale bars in all microscopy images.

11) The journal requires a statement specifying whether or not authors have competing interests (defined as all potential or actual interests that could be perceived to influence the presentation or interpretation of an article). In case of competing interests, this must be specified in your disclosure statement. Further information: <https://www.embopress.org/competing-interests>

We would also welcome the submission of cover suggestions, or motifs to be used by our Graphics Illustrator in designing a cover.

As part of the EMBO publication's Transparent Editorial Process, EMBO reports publishes online a Review Process File (RPF) to accompany accepted manuscripts. This File will be published in conjunction with your paper and will include the referee reports, your point-by-point response and all pertinent correspondence relating to the manuscript.

You are able to opt out of this by letting the editorial office know ([emboreports@embo.org](mailto:emboreports@embo.org)). If you do opt out, the Review Process File link will point to the following statement: "No Review Process File is available with this article, as the authors have chosen not to make the review process public in this case."

I look forward to seeing a revised form of your manuscript when it is ready.

Best regards,  
Esther

Referee #1:

Skinner et al. hand their work on "Spermatocytes have the capacity to segregate chromosomes despite centriole duplication failure" that focuses on the analysis of Plk4 functions in spermatogenesis of mammals (mice/human).

They first describe the localization of Plk4 in human testes stating that Plk4 does not undergo degradation between the meiotic divisions while still being "in check" for centriole duplication. Overexpression of Plk4 overrides the "check" and leads to centriole overduplication. In turn, pharmacological inhibition of Plk4 using centrinone strongly interferes with centriole duplication - like a conditional Plk4 ko in mice. Using the latter, the authors then show that, despite largely inhibited centriole duplication, meiotic divisions run surprisingly normal with regular bipolar meiotic spindles assembled. The authors rationalize that male spindle assembly must use an acentriolar mechanism, as a back-up, that allows centriole-free spindle pole assembly. The latter is suggested to not use centrosomal (PCM) proteins, including gamma tubulin, but rather works via CAMSAP1-3, TPX2 and NuMA. Finally, it is shown that the observed infertility in male Plk4 ko mice is a consequence of compromised spermatogenesis with defects in cilia formation and nuclear organization rather than the meiotic divisions.

Taken together, this work is certainly innovative and intriguing. It underlines that, as seen in many other systems, that the absence of centriole-based MTOCs still allows spindle assembly and function. The further observation that a centriole-independent pathway in male meiosis is independent of many centrosomal proteins but runs alternatively via CAMSAP, NuMA and TPX2, is, to my opinion, the most interesting part and justifies publication of the work in EMBO Reports. Having said this, the last point is also my main point of concern. The mechanism of the CAMSAP-NuMA-TPX2 mediated spindle pole formation, and possibly even nucleation in general in centriole-free poles, is not well characterized. While I do concede that detailed mechanistical insights may go beyond the scope of this paper, I feel that some more information is required here. Experiments to address this issue could include the following approaches:

1. Even though Dynein SEEMS to be absent from the non-centriolar pole (I find it actually hard to draw this conclusion), its inhibition is not addressed. It would be rather straight-forward to use Dynein inhibitors to find out if this leaves the centriole-free spindle pole organization intact, while it may still affect pole organization in e.g. female meiosis when using the same concentration.
2. Eg5/Kif11 has not been tested either. Mostly being at interpolar MT, it may still be required at poles or in the vicinity of poles to organize them. It is certainly required for complete centriole-free female meiosis. The same as with Dynein: one could use inhibitors to test the role of Kif11 in this unusual centriole-free pole formation, or spindle assembly with very different pole organization(s).
3. TPX2 is found tightly associated with Aurora A kinase in mitosis. The latter seems not to localize (or could not be detected) in spindle poles in male meiosis, while TPX2 certainly does. Again, inhibitors may be used to double check if kinase activity is required for centriole-free pole formation.
4. The statement of missing gamma-tubulin is rather weak. IFs of controls are visible but not strong. Nothing is seen along spindle MT. The negative argument loses impact when the (positive) control is already hard to see. Higher signals and a second gamma-TuRC marker may help to make this point more convincing.

Minor issues:

First paragraph in results: PLK4 present in one or two spots during meiotic divisions; it should be stated clearly how this compares to mitotic divisions and what would be the theoretical options for meiosis.

Centrinone-Inhibitor concentration of a factor of two below what can be tolerated in the system is a challenging condition and may easily cause pleiotropic side effects. This should be discussed.

Fig. 5: The authors should comment on why they think the ko phenotype is only largely but not completely penetrant; is it e.g. a timing of ko issue?

Fig. 6: What does it mean that the "spindle pole was reduced both in length and width"? Does this rather mean spindle hemisphere? The legend of Fig. 6 says "microtubule size"? It may be integrated into the cartoon what is quantified to avoid any misunderstanding of what is measured here.

Referee #2:

This is a well-executed study that investigates the role of the kinase PLK4, the master regulator of centriole duplication, during spermatogenesis. Using mouse models and in vitro culture the authors show that PLK4 is present at centrosomes throughout

meiotic cycles raising the question of how centriole duplication is restricted to occur only once per cycle. While the mechanism of how this is achieved remains to be determined, using overexpression, conditional knockout and chemical inhibition the authors show that this regulation can be overcome to induce extra or fewer centrioles in spermatocytes, similar to what has been observed in mitotic systems. Interestingly, cells that contain only one centriole can still form bipolar spindles (with one acentriolar pole) and progress through meiotic divisions. Perhaps more surprisingly, the acentriolar pole does not contain any of the proteins found at acentriolar poles in mitotic systems such as gamma-tubulin or CDK5RAP2. Instead, the authors identify TPX2, NUMA and CAMSAP proteins to localize to these poles, suggesting they may be involved in acentriolar pole formation and/or bipolar spindle assembly. While PLK4 is not essential for meiotic divisions, it is essential for sperm flagellum formation and fertility.

Overall the data is of high quality and supports the conclusions. I only have a few minor comments that should be addressed before publication.

- 1) Abstract (lines 23-27) and discussion (first paragraph) claim discovery of a new acentriolar mechanism of spindle assembly, but the mechanism has not been investigated. For example, where are MTs nucleated? At the remaining centrosome? At the chromatin? Is gamma-tubulin required? It likely is, despite no permanent localization at the acentriolar pole. Do monopolar spindles form first? Similarly, the involvement of TPX2, NUMA, and CAMSAPs, despite their localization to the acentriolar poles, has not been investigated. These issues could be discussed in more detail, but I suggest to not refer to "mechanism" and rephrase the corresponding sections.
- 2) Lines 269-272: I would explicitly state the increase in percentage with only one centriole to make the point of centriole loss clearer.
- 3) Earlier work, coauthored by one of the authors (Marjanovic et al. 2015, Nat Comms, DOI: 10.1038/ncomms8676) suggested a requirement for centrioles in meiotic recombination. I assume the reason why this is not observed in the current study is the timing of centriole loss. It seems that the presence of non-duplicated centrioles during meiosis I (as in the current study) is sufficient for providing this function. The earlier work could be cited and this could be discussed.
- 4) Suppl. Fig. 9: Some stainings seem to be triple stainings plus DAPI with alpha-tub shown in red. Others lack alpha-tub staining but still show both red and purple coloring for the single channel of the spindle associated proteins. This is redundant and confusing. I suggest to show only a single color (purple) as for the triple stainings. Similarly, for consistency, I would use the same color scheme (purple for spindle associated proteins) in Fig. 7B.
- 5) The presentation in Fig. 1A-D is confusing. What is shown in grey in the insets in the upper right corners? In general the insets should be magnified versions of the small white squares outlined in the main image. The PLK4 channels below the main image don't seem to be exactly the same as in the main image, at least they seem to show less detail. They also seem to be a bit redundant unless they provide visible detail not seen in the main image. The magnified squares showing the centrosome staining could be bigger.

#### Referee #3:

The manuscript by Skinner et al investigates the role of Plk4 during spermatogenesis using mouse models to overexpress or conditionally knock out Plk4. The manuscript is well written and the great majority of experiments are very well executed and nicely quantified. Having said that, this reviewer struggled to identify the novel findings in this work. The authors show that Plk4 is important for centriole duplication, and that its overexpression results in over duplication. These are well established in the field for nearly 20 years from many systems. The most novel finding is the non-centriolar localization of Plk4; however, the manuscript does not investigate this aspect and does not capitalize on the main strength of this system over cultured systems. Finally, the claim that they discovered a novel mechanism of spindle assembly that ensures chromosome segregation when centriole duplication fails is simply not true. What the authors found is that factors known to be involved in normal pole formation, and in other non-centrosome conditions, is also used in this context. Overall, the work is well done, but the novelty escapes me.

#### Major comments

1. The authors completely dismiss all work done in Drosophila spermatogenesis. Work from nearly 15 years ago from Bettencourt Dias on SAK, work by Callani on Sas-4, work by Avidor-Reiss on Plk4 that shows non-centriole duplication role for Plk4 in spermatogenesis, and many other studies were not mentioned.
2. Lines 270-281 include the idea that loss of Plk4 results in failed centriole maturation (becoming a mother), which results in degradation of the "immature parent centriole". This loss is presumably due the inability to become an independent MTOC, leading to centriole instability and disassembly (they reference 58 and 59). While the previous work might have shown this, I do not see how this conclusion is made based on the data presented here. Do the authors see immature parents that then are degraded? How is this shown? The presence of 1 centriole in 20% of plk4 cKO compared to loss of sas4 seems insufficient to make this conclusion. Given this is not a critical aspect of the paper, I suggest removing this section.

3. The section on TPX2, CAMSAP1-3 and NuMA is presented as if there was a major discovery or at least a "novel observation". This is simply not true. One can find extensive literature in many systems that show this is true in a-centrosomal conditions.

#### Minor comments

Line 130 - refence needed for Hspa2 expression pattern.

Line 157 - The argument for the use of higher concentration of centrinone is based on media diffusion. It could also be a result of a difference in biology between systems. For example, there might be higher levels or more stable amounts of Plk4

Figure 3a - are there typically more sperm in centrinone treated conditions as shown?

Figure 3C - should include untreaded control cartoon to show WT for the non-expert

Figure 3c-e - why show 8hr treatment here instead of 24 hr? Most the experiments subsequently are 24 hr

Figure 4g - can the authors show examples of abnormal sperm

Figure 7b - the chart is unnecessarily confusion. It seems more suited for a review.

Figure 10 - Do spermatids with centrioles form flagella? How frequently were defects seen?

Firstly, we would like to thank the reviewers for their time and expert critique of our manuscript. We have addressed all comments. We believe that our manuscript has been made much stronger thanks to addressing your feedback and hope that you will deem it suitable for acceptance at EMBO reports.

Our responses are highlighted in yellow, and the references to the text and figures are highlighted in green.

Referee #1:

Skinner et al. hand their work on "Spermatocytes have the capacity to segregate chromosomes despite centriole duplication failure" that focuses on the analysis of Plk4 functions in spermatogenesis of mammals (mice/human).

They first describe the localization of Plk4 in human testes stating that Plk4 does not undergo degradation between the meiotic divisions while still being "in check" for centriole duplication. Overexpression of Plk4 overrides the "check" and leads to centriole overduplication. In turn, pharmacological inhibition of Plk4 using centrinone strongly interferes with centriole duplication - like a conditional Plk4 ko in mice. Using the latter, the authors then show that, despite largely inhibited centriole duplication, meiotic divisions run surprisingly normal with regular bipolar meiotic spindles assembled. The authors rationalize that male spindle assembly must use an acentriolar mechanism, as a back-up, that allows centriole-free spindle pole assembly. The latter is suggested to not use centrosomal (PCM) proteins, including gamma tubulin, but rather works via CAMSAP1-3, TPX2 and NuMA. Finally, it is shown that the observed infertility in male Plk4 ko mice is a consequence of compromised spermatogenesis with defects in cilia formation and nuclear organization rather than the meiotic divisions.

Taken together, this work is certainly innovative and intriguing. It underlines that, as seen in many other systems, that the absence of centriole-based MTOCs still allows spindle assembly and function. The further observation that a centriole-independent pathway in male meiosis is independent of many centrosomal proteins but runs alternatively via CAMSAP, NuMA and TPX2, is, to my opinion, the most interesting part and justifies publication of the work in EMBO Reports. Having said this, the last point is also my main point of concern. The mechanism of the CAMSAP-NuMA-TPX2 mediated spindle pole formation, and possibly even nucleation in general in centriole-free poles, is not well characterized. While I do concede that detailed mechanistical insights may go beyond the scope of this paper, I feel that some more information is required here. Experiments to address this issue could include the following approaches:

We appreciate the request to include additional mechanistic insights in our study. To this end, we performed experiments to determine the relationship between PLK1 and PLK4. In a prior publication, we determined that conditional heterozygous mutation of *Plk1* (*Plk1* cHet) in spermatocytes results in centriole overduplication in prophase spermatocytes (Wellard et al. 2021). Therefore, we assessed the compound mutation of *Plk1* cHet; *Plk4* cKO to determine whether PLK4 function was upstream or downstream of PLK1 function regarding centriole duplication. We report that *Plk1* cHet; *Plk4* cKO spermatocytes undergo centriole duplication failure, as observed in *Plk4* cKO spermatocytes, indicating that PLK4 function is upstream to that of PLK1. Please see lines 358-368 and Figure 5K-N.

We also address additional suggestions to assess Dynein, Aurora A kinase, and KIF11/Eg5, see below.

1. Even though Dynein SEEMS to be absent from the non-centriolar pole (I find it actually hard to draw this conclusion), its inhibition is not addressed. It would be rather straight-forward to use Dynein

inhibitors to find out if this leaves the centriole-free spindle pole organization intact, while it may still affect pole organization in e.g. female meiosis when using the same concentration.

We assessed the localization of Dynein in *Plk4* cKO and control spermatocytes at meiosis I using newly acquired antibodies (See Appendix Table S2). We determined that Dynein does not localize to the ncMTOC in *Plk4* cKO spermatocytes. Please see lines 405-412 and Figure 8G and EV4L-N.

Thank you for your suggestion regarding inhibiting dynein to determine whether it is important for the formation/stability of the acentrosomal pole. Using isolated tubules from control and *Plk4* cKO mice undergoing the first wave of spermatogenesis, we inhibited Dynein with Dynarrestin. We determined that despite a slight disturbance to metaphase plate alignment, *Plk4* cKO spermatocytes harboring a ncMTOC continued to form bipolar spindles when treated with Dynarrestin. Please see lines 439-449 and Figure 8D-G.

2. Eg5/Kif11 has not been tested either. Mostly being at interpolar MT, it may still be required at poles or in the vicinity of poles to organize them. It is certainly required for complete centriole-free female meiosis. The same as with Dynein: one could use inhibitors to test the role of Kif11 in this unusual centriole-free pole formation, or spindle assembly with very different pole organization(s).

We assessed the localization of KIF11/Eg5 in *Plk4* cKO and control spermatocytes at meiosis I using a newly acquired antibody (See Appendix Table S2). We determined that KIF11 does localize to the ncMTOC. Please see lines 413-425 and Figure 7B.

Thank you for your suggestion regarding inhibiting KIF11/Eg5 to determine whether it is important for the formation/stability of the acentrosomal pole. Using isolated tubules from control and *Plk4* cKO mice undergoing the first wave of spermatogenesis, we inhibited KIF11/Eg5 with ARRY-520. We determined that KIF11 is required for maintaining a bipolar spindle in *Plk4* cKO spermatocytes that harbor a single centriole. The maintenance of a bipolar spindle was also affected in the control spermatocytes. Taken together, this suggests that KIF11 is critical for both centrosomal and non-centrosomal bipolar spindle formation in mammalian spermatocytes. Please see lines 450-458 and Figure 8H-J.

3. TPX2 is found tightly associated with Aurora A kinase in mitosis. The latter seems not to localize (or could not be detected) in spindle poles in male meiosis, while TPX2 certainly does. Again, inhibitors may be used to double check if kinase activity is required for centriole-free pole formation.

We previously reported AURKA localization during spermatogenesis, and the signal obtained for AURKA was specific (as determined by *Aurka* cKO), but was also punctate along the spindle (Wellard et al. 2021). This pattern was much less robust in signal intensity compared to TPX2. We tried many preparations to improve our immunostaining of AURKA using multiple antibodies (Thermo, MA5-15803; Abclonal, A2121; Cell signaling, 2914). We determined that AURKA cannot be detected at the ncMTOC in *Plk4* cKO spermatocytes. We have commented further on this issue. See lines 426-429.

Thank you for your suggestion regarding inhibiting Aurora A kinase to determine whether it is important for the formation/stability of the acentrosomal pole. Using isolated tubules from control and *Plk4* cKO mice undergoing the first wave of spermatogenesis, we inhibited Aurora A kinase with MLN8237. We determined that inhibition of AURKA does not affect TPX2 localization of bipolar spindle formation in *Plk4* cKO spermatocytes harboring a ncMTOC. As a control, we assessed the localization of another known AURKA binding partner and substrate, TACC3. Inhibition of AURKA led to the disruption of TACC3 localization to the spindle poles in mouse spermatocytes at metaphase I, as previously reported (Fig. 8A-C) (Simerly et al. 2024). Please see lines 426-438 and Figure 8A-C.

4. The statement of missing gamma-tubulin is rather weak. IFs of controls are visible but not strong. Nothing is seen along spindle MT. The negative argument loses impact when the (positive) control is already hard to see. Higher signals and a second gamma-TuRC marker may help to make this point more convincing.

We have assessed gamma-tubulin localization previously ([Wellard et al. 2021](#)). The localization of gamma-tubulin during spermatogenesis is more punctate compared to what is observed in mitotically dividing cells ([Wellard et al. 2021](#)). To further our assessment of gamma-tubulin, we assessed additional components of the gamma-TuRC complex (GCP2 and GCP4) using additional antibodies (See Appendix Table S2). We determined that both GCP2 and GCP4 do not localize to the ncMTOC in *Plk4* cKO spermatocytes. Please see lines 381-390, lines 561-563, as well as Figure 6A and EV4S-T.

Minor issues:

First paragraph in results: PLK4 present in one or two spots during meiotic divisions; it should be stated clearly how this compares to mitotic divisions and what would be the theoretical options for meiosis.

We have added this information in our revised manuscript. See lines 134-142.

Centrinone-Inhibitor concentration of a factor of two below what can be tolerated in the system is a challenging condition and may easily cause pleiotropic side effects. This should be discussed.

We have discussed this information in our revised manuscript. See lines 210-214.

Fig. 5: The authors should comment on why they think the ko phenotype is only largely but not completely penetrant; is it e.g. a timing of ko issue?

We have discussed this information in our revised manuscript. See lines 327-331.

Fig. 6: What does it mean that the "spindle pole was reduced both in length and width"? Does this rather mean spindle hemisphere? The legend of Fig. 6 says "microtubule size"? It may be integrated into the cartoon what is quantified to avoid any misunderstanding of what is measured here.

We have revised this information in the figure legend and represented it in the cartoons. See lines 391-329, lines 732-738, and Figure 6B.

Referee #2:

This is a well-executed study that investigates the role of the kinase PLK4, the master regulator of centriole duplication, during spermatogenesis. Using mouse models and in vitro culture the authors show that PLK4 is present at centrosomes throughout meiotic cycles raising the question of how centriole duplication is restricted to occur only once per cycle. While the mechanism of how this is achieved remains to be determined, using overexpression, conditional knockout and chemical inhibition the authors show that this regulation can be overcome to induce extra or fewer centrioles in spermatocytes, similar to what has been observed in mitotic systems. Interestingly, cells that contain only one centriole can still form bipolar spindles (with one acentriolar pole) and progress through meiotic divisions. Perhaps more surprisingly, the acentriolar pole does not contain any of the proteins

found at acentriolar poles in mitotic systems such as gamma-tubulin or CDK5RAP2. Instead, the authors identify TPX2, NUMA and CAMSAP proteins to localize to these poles, suggesting they may be involved in acentriolar pole formation and/or bipolar spindle assembly. While PLK4 is not essential for meiotic divisions, it is essential for sperm flagellum formation and fertility.

Overall the data is of high quality and supports the conclusions. I only have a few minor comments that should be addressed before publication.

1) Abstract (lines 23-27) and discussion (first paragraph) claim discovery of a new acentriolar mechanism of spindle assembly, but the mechanism has not been investigated. For example, where are MTs nucleated? At the remaining centrosome? At the chromatin? Is gamma-tubulin required? It likely is, despite no permanent localization at the acentriolar pole. Do monopolar spindles form first? Similarly, the involvement of TPX2, NUMA, and CAMSAPs, despite their localization to the acentriolar poles, has not been investigated. These issues could be discussed in more detail, but I suggest to not refer to "mechanism" and rephrase the corresponding sections.

Thank you for your guidance. We have rephrased the abstract and discussion to concur. See lines 23-26 and lines 510-511.

2) Lines 269-272: I would explicitly state the increase in percentage with only one centriole to make the point of centriole loss clearer.

We have included that statement. Please see lines 326-327.

3) Earlier work, coauthored by one of the authors (Marjanovic et al. 2015, Nat Comms, DOI: 10.1038/ncomms8676) suggested a requirement for centrioles in meiotic recombination. I assume the reason why this is not observed in the current study is the timing of centriole loss. It seems that the presence of non-duplicated centrioles during meiosis I (as in the current study) is sufficient for providing this function. The earlier work could be cited and this could be discussed.

We have included reference to this work and discussed the point that centrosome biogenesis may be linked with meiotic recombination. See lines 300-315.

While it is possible that centrosome biogenesis may affect meiotic recombination, we also point out that that assessment of the *Cep63* gene-trap allele serves as a model for Seckel syndrome. From our ongoing studies, a ciliopathy can significantly impact meiosis progression beyond the effects attributed solely to centriole duplication during zygotene. Additionally, knowledge of the timing of centrosome and centriole duplication in meiosis was limited back in 2015. This has significantly evolved with our two EMBO Reports publications in 2021 (Wellard et al. 2021 and Alfaro et al. 2021). The differences may also be explained by the fact that the *Cep63* gene-trap mutation was present within all mouse cells, whereas the *Plk4* cKO only occurred in primary spermatocytes. For instance, the *Cep63* gene-trap mutation leads to microcephaly (Marjanović et al, 2015), which could affect the regulation of the hypothalamus-pituitary gonadal axis (Cerbone et al, 2020).

4) Suppl. Fig. 9: Some staining's seem to be triple staining's plus DAPI with alpha-tub shown in red. Others lack alpha-tub staining but still show both red and purple coloring for the single channel of the spindle associated proteins. This is redundant and confusing. I suggest to show only a single color (purple) as for the triple stainings. Similarly, for consistency, I would use the same color scheme (purple for spindle associated proteins) in Fig. 7B.

We have rearranged this figure and added additional factors that were assessed. We have kept the figure panel layout and coloring consistent with one another. This figure is now titled Figure EV4.

5) The presentation in Fig. 1A-D is confusing. What is shown in grey in the insets in the upper right corners? In general the insets should be magnified versions of the small white squares outlined in the main image. The PLK4 channels below the main image don't seem to be exactly the same as in the main image, at least they seem to show less detail. They also seem to be a bit redundant unless they provide visible detail not seen in the main image. The magnified squares showing the centrosome staining could be bigger.

We have edited Figure 1A-D. Please see Figure 1A-F.

Referee #3:

The manuscript by Skinner et al investigates the role of Plk4 during spermatogenesis using mouse models to overexpress or conditionally knock out Plk4. The manuscript is well written and the great majority of experiments are very well executed and nicely quantified. Having said that, this reviewer struggled to identify the novel findings in this work. The authors show that Plk4 is important for centriole duplication, and that its overexpression results in over duplication. These are well established in the field for nearly 20 years from many systems. The most novel finding is the non-centriolar localization of Plk4; however, the manuscript does not investigate this aspect and does not capitalize on the main strength of this system over cultured systems. Finally, the claim that they discovered a novel mechanism of spindle assembly that ensures chromosome segregation when centriole duplication fails is simply not true. What the authors found is that factors known to be involved in normal pole formation, and in other non-centrosome conditions, is also used in this context. Overall, the work is well done, but the novelty escapes me.

Major comments

1. The authors completely dismiss all work done in *Drosophila* spermatogenesis. Work from nearly 15 years ago from Bettencourt Dias on SAK, work by Callani on Sas-4, work by Avidor-Reiss on Plk4 that shows non-centriole duplication role for Plk4 in spermatogenesis, and many other studies were not mentioned.

We thank the reviewer for pointing out the need to discuss these important works. We have included paragraphs in our discussion that highlight these works and other studies to relate them to our newly reported findings in mammalian spermatogenesis. Please see lines 551-583.

2. Lines 270-281 include the idea that loss of Plk4 results in failed centriole maturation (becoming a mother), which results in degradation of the "immature parent centriole". This loss is presumably due the inability to become an independent MTOC, leading to centriole instability and disassembly (they reference 58 and 59). While the previous work might have shown this, I do not see how this conclusion is made based on the data presented here. Do the authors see immature parents that then are degraded? How is this shown? The presence of 1 centriole in 20% of plk4 cKO compared to loss of sas4 seems insufficient to make this conclusion. Given this is not a critical aspect of the paper, I suggest removing this section.

We have further bolstered this section by including additional data regarding the observation of spermatocytes with 2 centrioles becoming spermatocytes with 1 centriole. See lines 332-346. We respectfully disagree that removing it is necessary, given that we provide further details, prior work also supports this observation, and it is a scenario that does not occur when centriole duplication is prevented by lack of a structural component (SAS4) rather than the absence of the regulator of centriole duplication (PLK4).

3. The section on TPX2, CAMSAP1-3 and NuMA is presented as if there was a major discovery or at least a "novel observation". This is simply not true. One can find extensive literature in many systems that show this is true in a-centrosomal conditions.

We discuss prior observations regarding TPX2, CAMSAP1-3, and NuMA within the relevant results section (see lines 413-425) and the discussion section (see lines 510-530). We have removed the term "novel observation" and the word novel from the text and simply include them as observations.

Minor comments

Line 130 - reference needed for Hspa2 expression pattern.

Included. See line 177.

Line 157 - The argument for the use of higher concentration of centrinone is based on media diffusion. It could also be a result of a difference in biology between systems. For example, there might be higher levels or more stable amounts of Plk4

We have adjusted this accordingly. See lines 208-214.

Figure 3a - are there typically more sperm in centrinone treated conditions as shown?

No, the control and centrinone-B treated groups are from the same source of spermatocytes.

Therefore, there is no difference between them in regard to any cell stage of spermatogenesis. It is just a happenstance that there are more elongated spermatids in the field of view. There are more round spermatids in the control field of view.

Figure 3C - should include untreated control cartoon to show WT for the non-expert

We have included an untreated control cartoon. See Figure 3D.

Figure 3c-e - why show 8hr treatment here instead of 24 hr? Most the experiments subsequently are 24 hr

We have included both the 8 hr and 24 hr treatment figures. See Figure 3B-C and 3F-G.

Figure 4g - can the authors show examples of abnormal sperm

We assess the spermiogenesis abnormalities in detail in Figure 9A-H and show additional examples of abnormal sperm in Figure 9H-J.

Figure 7b - the chart is unnecessarily confusion. It seems more suited for a review.

We believe the reviewer is referring to Figure 7a. We respectfully disagree. As this is a minor comment and not noted by the other two reviewers, we would like to opt to keep this feature.

Figure 10 - Do spermatids with centrioles form flagella? How frequently were defects seen?

The Plk4 cKO spermatids never form a normal flagellum. The defects we see include the absence of flagella, the absence of  $\delta$ -tubulin at the perinuclear ring structure, and misshapen spermatozoa heads characterized with DNA and acrosome staining. These defects are fully penetrant because flagella formation requires two centrioles to be inherited by the spermatid. This is necessary because one centriole becomes the proximal centriole that lies perpendicular to the base of the spermatid head, and the other becomes an atypical distal centriole. We have further elaborated on these observations.

See lines 480-504 and Figures 9E-J.

Dear Dr. Jordan,

Thank you for the submission of your revised manuscript. We have now received the enclosed reports from the referees that were asked to assess it. Referee 2 has one more suggestions that I would like you to incorporate before we can proceed with the official acceptance of your manuscript.

A few editorial requests will also need to be addressed:

- Please reduce the number of keywords to 5.
- Please rename the conflict of interest subheading to "Disclosure and Competing Interest Statement"
- Please correct the author name discrepancy: Rocío Gómez in the ms file versus Rocio Gomez Lencero in our online submission system.
- The author credits need to be removed from the ms file. All credits need to be entered during online ms submission.
- The Abbreviations section needs to be removed from the manuscript. Abbreviations should be defined in brackets after their first mention in the text, not in a list of abbreviations.
- Disclaimer section and Materials and correspondence should be removed from the ms.
- Materials and Methods needs to be called Methods.
- Figure EV4 runs over 3 pages, we don't allow that. All figure must fit onto one page. Please amend.
- Please note that the figure 3f-g is mislabeled as figure 3f in the manuscript. This needs to be rectified.
- Please note that the figure 8b is mislabeled as figure 8d in the data information section of the manuscript. This needs to be rectified.
- Please note that the exact p values are not provided in the legends of figures 2i-j, l; 3f-g; 4g, i; 5b, f, h, j, n; 6d; 9c-d; EV 1f; EV 3h. Please add the exact values.
- Please note that the scale bar is missing for figure 9b.
- Please note that the scale bar needs to be defined for figure EV 3g.

I would like to suggest a few minor changes to the abstract that needs to be written in present tense. Please also add information on the species used in this study to the abstract. Please let me know whether you agree with the following:

Centrosomes are the canonical microtubule organizing centers (MTOCs) of most mammalian cells, including spermatocytes. Centrosomes comprise a centriole pair within a structurally ordered and dynamic pericentriolar matrix (PCM). Unlike in mitosis, where centrioles duplicate once per cycle, centrioles undergo two rounds of duplication during spermatogenesis. The first duplication is during early prophase I, and the second is during interkinesis. Using mouse mutants and chemical inhibition, we here block centriole duplication during spermatogenesis and show that non-centrosomal MTOCs (ncMTOCs) can mediate chromosome segregation. This mechanism is different [OK?] from the acentriolar MTOCs that form bipolar spindles in oocytes, which require PCM components, including gamma-tubulin and CEP192. From an in-depth analysis, we identify six microtubule-associated proteins, TPX2, KIF11, NuMA, and CAMSAP1-3, that localize to the non-centrosomal MTOC. These factors contribute to a mechanism that ensures bipolar MTOC formation and chromosome segregation during spermatogenesis when centriole duplication fails. However, despite the successful completion of meiosis and round spermatid formation, centriole inheritance and PLK4 function are required for normal spermiogenesis and flagella assembly, which are critical for fertility.

EMBO press papers are accompanied online by A) a short (1-2 sentences) summary of the findings and their significance, B) 2-3 bullet points highlighting key results and C) a synopsis image that is exactly 550 pixels wide and 200-600 pixels high (the height is variable). The synopsis image should provide a sketch of the major findings, like a graphical abstract. Please note that text needs to be readable at the final size. Please send us this information along with the final manuscript.

I look forward to seeing a final version of your manuscript as soon as possible. Please use this link to submit your revision: <https://embor.msubmit.net/cgi-bin/main.plex>

Best regards,  
Esther

Esther Schnapp, PhD  
Senior Editor  
EMBO reports

Referee #1:

I stay with my previous evaluation that the work of Skinner et al. is innovative and interesting. Having revised their work, the authors further characterize a centriole-independent pathway in male meiosis that even does not require key centrosomal proteins but runs via CAMSAP, NuMA and TPX2.

A main point of criticism was that the negative conclusion of the pathway not requiring otherwise central spindle pole organizers such as Dynein, KIF11, Aurora A and g-TuRC was not well documented. Several approaches added to the manuscript (Fig. 5 and 8 in particular) document the effort to test these activities, or their localization, and either confirm (Dynein, Aurora A, g-TuRC) that they are not involved, or a requirement (KIFF11). Furthermore, the authors have addressed several minor points I had raised (see e.g. Fig. 6B). Taken together, to my opinion, the current version is significantly increased in clarity & quality to justify publication of the manuscript in EMBO R in its present form.

Referee #2:

The authors have addressed most of the concerns raised by the reviewers by both text changes and addition of new data.

Regarding referencing previous work in other systems (reviewer 3, point 1), the authors have now included a discussion of these studies. However, I strongly suggest to mention and cite some of the key findings from these other systems already in the introduction, to position the current study in the appropriate context. This is important for the non-expert reader to understand the premise for the current work and be able to assess the novelty of the findings.

**Thank you for your reviews. Our responses are highlighted in yellow, and the references to the text and figures are highlighted in green.**

Editorial Edits:

- Please reduce the number of keywords to 5.

We have adjusted this accordingly. See line 35.

- Please rename the conflict of interest subheading to "Disclosure and Competing Interest Statement"

We have adjusted this accordingly. See line 721.

- Please correct the author name discrepancy: Rocío Gómez in the ms file versus Rocio Gomez Lencero in our online submission system.

Rocío Gómez is the author's choice of author publication name, which has been used for decades (including publications with EMBO Reports), and they want this to be the name used on the manuscript. However, their legal name is Rocio Gomez Lencero, and this is why their profile included this name. I have deleted "Lencero" from the author profile list online. I hope this is sufficient.

- The author credits need to be removed from the ms file. All credits need to be entered during online ms submission.

We have removed this text.

- The Abbreviations section needs to be removed from the manuscript. Abbreviations should be defined in brackets after their first mention in the text, not in a list of abbreviations.

We have removed the list. All abbreviations are listed after their first mention in the text.

- Disclaimer section and Materials and correspondence should be removed from the ms.

We have removed this text.

- Materials and Methods needs to be called Methods.

We have adjusted this accordingly. See line 588.

- Figure EV4 runs over 3 pages, we don't allow that. All figure must fit onto one page. Please amend.

We have reduced the size of this figure and transferred additional images to the appendix. See Figure EV4 and Appendix Figure S1.

- Please note that the figure 3f-g is mislabeled as figure 3f in the manuscript. This needs to be rectified.

We have adjusted this accordingly. See lines 1137 - 1143.

- Please note that the figure 8b is mislabeled as figure 8d in the data information section of the manuscript. This needs to be rectified.

We have adjusted this accordingly.

- Please note that the exact p values are not provided in the legends of figures 2i-j, l; 3f-g; 4g, i; 5b, f, h, j, n; 6d; 9c-d; EV 1f; EV 3h. Please add the exact values.

We have adjusted this accordingly. See the figure legends of each corresponding figure.

- Please note that the scale bar is missing for figure 9b.

We have made this correction. See Figure 9b.

- Please note that the scale bar needs to be defined for figure EV 3g.

We have made this correction. See lines 1434 - 1435.

I would like to suggest a few minor changes to the abstract that needs to be written in present tense. Please also add information on the species used in this study to the abstract. Please let me know whether you agree with the following:

Centrosomes are the canonical microtubule organizing centers (MTOCs) of most mammalian cells, including spermatocytes. Centrosomes comprise a centriole pair within a structurally ordered and dynamic pericentriolar matrix (PCM). Unlike in mitosis, where centrioles duplicate once per cycle, centrioles undergo two rounds of duplication during spermatogenesis. The first duplication is during early prophase I, and the second is during interkinesis. Using mouse mutants and chemical inhibition, we here block centriole duplication during spermatogenesis and show that non-centrosomal MTOCs (ncMTOCs) can mediate chromosome segregation. This mechanism is different [OK?] from the acentriolar MTOCs that form bipolar spindles in oocytes, which require PCM components, including gamma-tubulin and CEP192. From an in-depth analysis, we identify six microtubule-associated proteins, TPX2, KIF11, NuMA, and CAMSAP1-3, that localize to the non-centrosomal MTOC. These factors contribute to a mechanism that ensures bipolar MTOC formation and chromosome segregation during spermatogenesis when centriole duplication fails. However, despite the successful completion of meiosis and round spermatid formation, centriole inheritance and PLK4 function are required for normal spermiogenesis and flagella assembly, which are critical for fertility.

We have made the adjustments as suggested. See line 25.

EMBO press papers are accompanied online by A) a short (1-2 sentences) summary of the findings and their significance, B) 2-3 bullet points highlighting key results and C) a synopsis image that is exactly 550 pixels wide and 200-600 pixels high (the height is variable). The synopsis image should provide a sketch of the major findings, like a graphical abstract. Please note that text needs to be readable at the final size. Please send us this information along with the final manuscript.

To address A) and B): We have included a document called "EMBOR-2023-58638V3 - Summary statement and bullet points".

To address C): We have also included a synopsis image called "EMBOR-2023-58638V3 - Graphical abstract".

Referee #1:

I stay with my previous evaluation that the work of Skinner et al. is innovative and interesting. Having revised their work, the authors further characterize a centriole-independent pathway in male meiosis that even does not require key centrosomal proteins but runs via CAMSAP, NuMA and TPX2. A main point of criticism was that the negative conclusion of the pathway not requiring otherwise central spindle pole organizers such as Dynein, KIF11, Aurora A and g-TuRC was not well documented. Several approaches added to the manuscript (Fig. 5 and 8 in particular) document the effort to test these activities, or their localization, and either confirm (Dynein, Aurora A, g-TuRC) that they are not involved, or a requirement (KIFF11). Furthermore, the authors have addressed several minor points I had raised (see e.g. Fig. 6B). Taken together, to my opinion, the current version is

significantly increased in clarity & quality to justify publication of the manuscript in EMBO R in its present form.

Thank you!

Referee #2:

The authors have addressed most of the concerns raised by the reviewers by both text changes and addition of new data.

Regarding referencing previous work in other systems (reviewer 3, point 1), the authors have now included a discussion of these studies. However, I strongly suggest to mention and cite some of the key findings from these other systems already in the introduction, to position the current study in the appropriate context. This is important for the non-expert reader to understand the premise for the current work and be able to assess the novelty of the findings.

In the introduction, we have included additional references to studies on other model organisms. See lines 75 - 77.

Dr. Philip Jordan  
Johns Hopkins University Bloomberg School of Public Health  
Biochemistry and Molecular Biology  
615 N. Wolfe St  
Room E8626  
Baltimore, MD 21205  
United States

Dear Dr. Jordan,

I am very pleased to accept your manuscript for publication in the next available issue of EMBO reports. Thank you for your contribution to our journal.

Your manuscript will be processed for publication by EMBO Press. It will be copy edited and you will receive page proofs prior to publication. Please note that you will be contacted by Springer Nature Author Services to complete licensing and payment information.

You may qualify for financial assistance for your publication charges - either via a Springer Nature fully open access agreement or an EMBO initiative. Check your eligibility: <https://www.embopress.org/page/journal/14693178/authorguide#chargesguide>

Should you be planning a Press Release on your article, please get in contact with [embo\\_production@springernature.com](mailto:embo_production@springernature.com) as early as possible in order to coordinate publication and release dates.

If you have any questions, please do not hesitate to contact the Editorial Office. Thank you for your contribution to EMBO Reports.

Best regards,  
Esther

Esther Schnapp, PhD  
Senior Editor  
EMBO reports

-----  
  
>>> Please note that it is EMBO Reports policy for the transcript of the editorial process (containing referee reports and your response letter) to be published as an online supplement to each paper. If you do NOT want this, you will need to inform the Editorial Office via email immediately. More information is available here: [https://www.embopress.org/transparent-process#Review\\_Process](https://www.embopress.org/transparent-process#Review_Process)

## EMBO Press Author Checklist

Corresponding Author Name: Philip Jordan  
 Journal Submitted to: EMBO Reports  
 Manuscript Number: EMBOR-2023-58638V2

### USEFUL LINKS FOR COMPLETING THIS FORM

[The EMBO Journal - Author Guidelines](#)  
[EMBO Reports - Author Guidelines](#)  
[Molecular Systems Biology - Author Guidelines](#)  
[EMBO Molecular Medicine - Author Guidelines](#)

### Reporting Checklist for Life Science Articles (updated January)

This checklist is adapted from Materials Design Analysis Reporting (MDAR) Checklist for Authors. MDAR establishes a minimum set of requirements in transparent reporting in the life sciences (see Statement of Task: [10.31222/osf.io/9sm4x](https://doi.org/10.31222/osf.io/9sm4x)). Please follow the journal's guidelines in preparing your

**Please note that a copy of this checklist will be published alongside your article.**

### Abridged guidelines for figures

#### 1. Data

The data shown in figures should satisfy the following conditions:

- the data were obtained and processed according to the field's best practice and are presented to reflect the results of the experiments in an accurate and unbiased manner.
- ideally, figure panels should include only measurements that are directly comparable to each other and obtained with the same assay.
- plots include clearly labeled error bars for independent experiments and sample sizes. Unless justified, error bars should not be shown for technical
- if  $n < 5$ , the individual data points from each experiment should be plotted. Any statistical test employed should be justified.
- Source Data should be included to report the data underlying figures according to the guidelines set out in the authorship guidelines on Data

#### 2. Captions

Each figure caption should contain the following information, for each panel where they are relevant:

- a specification of the experimental system investigated (eg cell line, species name).
- the assay(s) and method(s) used to carry out the reported observations and measurements.
- an explicit mention of the biological and chemical entity(ies) that are being measured.
- an explicit mention of the biological and chemical entity(ies) that are altered/ varied/ perturbed in a controlled manner.
- the exact sample size (n) for each experimental group/condition, given as a number, not a range;
- a description of the sample collection allowing the reader to understand whether the samples represent technical or biological replicates (including how many animals, litters, cultures, etc.).
- a statement of how many times the experiment shown was independently replicated in the laboratory.
- definitions of statistical methods and measures:
  - common tests, such as t-test (please specify whether paired vs. unpaired), simple  $\chi^2$  tests, Wilcoxon and Mann-Whitney tests, can be unambiguously identified by name only, but more complex techniques should be described in the methods section;
  - are tests one-sided or two-sided?
  - are there adjustments for multiple comparisons?
  - exact statistical test results, e.g., P values = x but not P values < x;
  - definition of 'center values' as median or average;
  - definition of error bars as s.d. or s.e.m.

**Please complete ALL of the questions below.**  
**Select "Not Applicable" only when the requested information is not relevant for your study.**

### Materials

| <b>Newly Created Materials</b>                                                                                                                                                                                              | <b>Information included in the manuscript?</b> | <b>In which section is the information available?</b><br>(Reagents and Tools Table, Materials and Methods, Figures, Data Availability Section) |
|-----------------------------------------------------------------------------------------------------------------------------------------------------------------------------------------------------------------------------|------------------------------------------------|------------------------------------------------------------------------------------------------------------------------------------------------|
| New materials and reagents need to be available; do any restrictions apply?                                                                                                                                                 | Not Applicable                                 | Materials and Methods                                                                                                                          |
| <b>Antibodies</b>                                                                                                                                                                                                           | <b>Information included in the manuscript?</b> | <b>In which section is the information available?</b><br>(Reagents and Tools Table, Materials and Methods, Figures, Data Availability Section) |
| For <b>antibodies</b> provide the following information:<br>- Commercial antibodies: RRID (if possible) or supplier name, catalogue number and/or clone number<br>- Non-commercial: RRID or citation                        | Yes                                            | Appendix Table S2                                                                                                                              |
| <b>DNA and RNA sequences</b>                                                                                                                                                                                                | <b>Information included in the manuscript?</b> | <b>In which section is the information available?</b><br>(Reagents and Tools Table, Materials and Methods, Figures, Data Availability Section) |
| Short novel DNA or RNA including primers, probes: provide the sequences.                                                                                                                                                    | Yes                                            | Appendix Table S1                                                                                                                              |
| <b>Cell materials</b>                                                                                                                                                                                                       | <b>Information included in the manuscript?</b> | <b>In which section is the information available?</b><br>(Reagents and Tools Table, Materials and Methods, Figures, Data Availability Section) |
| <b>Cell lines:</b> Provide species information, strain. Provide accession number in repository <b>OR</b> supplier name, catalog number, clone number, and <b>OR</b> RRID.                                                   | Not Applicable                                 |                                                                                                                                                |
| <b>Primary cultures:</b> Provide species, strain, sex of origin, genetic modification status.                                                                                                                               | Not Applicable                                 |                                                                                                                                                |
| Report if the cell lines were recently <b>authenticated</b> (e.g., by STR profiling) and tested for mycoplasma contamination.                                                                                               | Not Applicable                                 |                                                                                                                                                |
| <b>Experimental animals</b>                                                                                                                                                                                                 | <b>Information included in the manuscript?</b> | <b>In which section is the information available?</b><br>(Reagents and Tools Table, Materials and Methods, Figures, Data Availability Section) |
| <b>Laboratory animals or Model organisms:</b> Provide species, strain, sex, age, genetic modification status. Provide accession number in repository <b>OR</b> supplier name, catalog number, clone number, <b>OR</b> RRID. | Yes                                            | Materials and methods                                                                                                                          |
| <b>Animal observed in or captured from the field:</b> Provide species, sex, and age where possible.                                                                                                                         | Not Applicable                                 |                                                                                                                                                |
| Please detail <b>housing and husbandry conditions</b> .                                                                                                                                                                     | Yes                                            | Materials and methods                                                                                                                          |
| <b>Plants and microbes</b>                                                                                                                                                                                                  | <b>Information included in the manuscript?</b> | <b>In which section is the information available?</b><br>(Reagents and Tools Table, Materials and Methods, Figures, Data Availability Section) |
| <b>Plants:</b> provide species and strain, ecotype and cultivar where relevant, unique accession number if available, and source (including location for collected wild specimens).                                         | Not Applicable                                 |                                                                                                                                                |
| <b>Microbes:</b> provide species and strain, unique accession number if available, and source.                                                                                                                              | Not Applicable                                 |                                                                                                                                                |
| <b>Human research participants</b>                                                                                                                                                                                          | <b>Information included in the manuscript?</b> | <b>In which section is the information available?</b><br>(Reagents and Tools Table, Materials and Methods, Figures, Data Availability Section) |
| If collected and within the bounds of privacy constraints report on age, sex and gender or ethnicity for all study participants.                                                                                            | Not Applicable                                 |                                                                                                                                                |
| <b>Core facilities</b>                                                                                                                                                                                                      | <b>Information included in the manuscript?</b> | <b>In which section is the information available?</b><br>(Reagents and Tools Table, Materials and Methods, Figures, Data Availability Section) |
| If your work benefited from core facilities, was their service mentioned in the acknowledgments section?                                                                                                                    | Not Applicable                                 |                                                                                                                                                |

### Design

| <b>Study protocol</b>                                                                                                                                                                                                                                                                                                                      | <b>Information included in the manuscript?</b> | <b>In which section is the information available?</b><br>(Reagents and Tools Table, Materials and Methods, Figures, Data Availability Section) |
|--------------------------------------------------------------------------------------------------------------------------------------------------------------------------------------------------------------------------------------------------------------------------------------------------------------------------------------------|------------------------------------------------|------------------------------------------------------------------------------------------------------------------------------------------------|
| If study protocol has been <b>pre-registered</b> , provide DOI in the manuscript. For clinical trials, provide the trial registration number OR cite DOI.                                                                                                                                                                                  | Not Applicable                                 |                                                                                                                                                |
| Report the <b>clinical trial registration number</b> (at ClinicalTrials.gov or equivalent), where applicable.                                                                                                                                                                                                                              | Not Applicable                                 |                                                                                                                                                |
| <b>Laboratory protocol</b>                                                                                                                                                                                                                                                                                                                 | <b>Information included in the manuscript?</b> | <b>In which section is the information available?</b><br>(Reagents and Tools Table, Materials and Methods, Figures, Data Availability Section) |
| Provide DOI OR other citation details if <b>external detailed step-by-step protocols</b> are available.                                                                                                                                                                                                                                    | Yes                                            | Materials and methods                                                                                                                          |
| <b>Experimental study design and statistics</b>                                                                                                                                                                                                                                                                                            | <b>Information included in the manuscript?</b> | <b>In which section is the information available?</b><br>(Reagents and Tools Table, Materials and Methods, Figures, Data Availability Section) |
| Include a statement about <b>sample size</b> estimate even if no statistical methods were used.                                                                                                                                                                                                                                            | Yes                                            | Figures                                                                                                                                        |
| Were any steps taken to minimize the effects of subjective bias when allocating animals/samples to treatment (e.g. <b>randomization procedure</b> )? If yes, have they been described?                                                                                                                                                     | Not Applicable                                 |                                                                                                                                                |
| Include a statement about <b>blinding</b> even if no blinding was done.                                                                                                                                                                                                                                                                    | Not Applicable                                 |                                                                                                                                                |
| Describe <b>inclusion/exclusion criteria</b> if samples or animals were excluded from the analysis. Were the criteria pre-established?                                                                                                                                                                                                     | Not Applicable                                 |                                                                                                                                                |
| If sample or data points were omitted from analysis, report if this was due to <b>attrition or intentional exclusion</b> and provide justification.                                                                                                                                                                                        | Not Applicable                                 |                                                                                                                                                |
| For every figure, are <b>statistical tests</b> justified as appropriate? Do the data meet the assumptions of the tests (e.g., normal distribution)? Describe any methods used to assess it. Is there an estimate of variation within each group of data? Is the variance similar between the groups that are being statistically compared? | Yes                                            | Figures                                                                                                                                        |
| <b>Sample definition and in-laboratory replication</b>                                                                                                                                                                                                                                                                                     | <b>Information included in the manuscript?</b> | <b>In which section is the information available?</b><br>(Reagents and Tools Table, Materials and Methods, Figures, Data Availability Section) |
| In the figure legends: state number of times the experiment was <b>replicated in laboratory</b> .                                                                                                                                                                                                                                          | Yes                                            |                                                                                                                                                |
| In the figure legends: define whether data describe <b>technical or biological replicates</b> .                                                                                                                                                                                                                                            | Yes                                            |                                                                                                                                                |

#### Ethics

| <b>Ethics</b>                                                                                                                                                                                                                                                                                            | <b>Information included in the manuscript?</b> | <b>In which section is the information available?</b><br>(Reagents and Tools Table, Materials and Methods, Figures, Data Availability Section) |
|----------------------------------------------------------------------------------------------------------------------------------------------------------------------------------------------------------------------------------------------------------------------------------------------------------|------------------------------------------------|------------------------------------------------------------------------------------------------------------------------------------------------|
| Studies involving <b>human participants</b> : State details of <b>authority granting ethics approval</b> (IRB or equivalent committee(s)), provide reference number for approval.                                                                                                                        | Yes                                            | Materials and methods                                                                                                                          |
| Studies involving <b>human participants</b> : Include a statement confirming that <b>informed consent</b> was obtained from all subjects and that the experiments conformed to the principles set out in the WMA Declaration of Helsinki and the Department of Health and Human Services Belmont Report. | Not Applicable                                 |                                                                                                                                                |
| Studies involving <b>human participants</b> : For publication of <b>patient photos</b> , include a statement confirming that consent to publish was obtained.                                                                                                                                            | Not Applicable                                 |                                                                                                                                                |
| Studies involving experimental <b>animals</b> : State details of <b>authority granting ethics approval</b> (IRB or equivalent committee(s)), provide reference number for approval. Include a statement of compliance with ethical regulations.                                                          | Yes                                            | Materials and methods                                                                                                                          |
| Studies involving <b>specimen and field samples</b> : State if relevant <b>permits</b> obtained, provide details of authority approving study; if none were required, explain why.                                                                                                                       | Not Applicable                                 |                                                                                                                                                |
| <b>Dual Use Research of Concern (DURC)</b>                                                                                                                                                                                                                                                               | <b>Information included in the manuscript?</b> | <b>In which section is the information available?</b><br>(Reagents and Tools Table, Materials and Methods, Figures, Data Availability Section) |
| Could your study fall under dual use research restrictions? Please check biosecurity documents and list of <b>select agents and toxins</b> (CDC): <a href="https://www.selectagents.gov/sat/list.htm">https://www.selectagents.gov/sat/list.htm</a>                                                      | Not Applicable                                 |                                                                                                                                                |
| If you used a select agent, is the security level of the lab appropriate and reported in the manuscript?                                                                                                                                                                                                 | Not Applicable                                 |                                                                                                                                                |
| If a study is subject to dual use research of concern regulations, is the name of the <b>authority granting approval and reference number</b> for the regulatory approval provided in the manuscript?                                                                                                    | Not Applicable                                 |                                                                                                                                                |

#### Reporting

The MDAR framework recommends adoption of discipline-specific guidelines, established and endorsed through community initiatives. Journals have their own policy about requiring specific guidelines and recommendations to complement MDAR.

| <b>Adherence to community standards</b>                                                                                                                                                                                                                                                                                              | <b>Information included in the manuscript?</b> | <b>In which section is the information available?</b><br>(Reagents and Tools Table, Materials and Methods, Figures, Data Availability Section) |
|--------------------------------------------------------------------------------------------------------------------------------------------------------------------------------------------------------------------------------------------------------------------------------------------------------------------------------------|------------------------------------------------|------------------------------------------------------------------------------------------------------------------------------------------------|
| State if relevant guidelines or checklists (e.g., ICMJE, MIBBI, ARRIVE, PRISMA) have been followed or provided.                                                                                                                                                                                                                      | Not Applicable                                 |                                                                                                                                                |
| For <b>tumor marker prognostic studies</b> , we recommend that you follow the <b>REMARK</b> reporting guidelines (see link list at top right). See author guidelines, under 'Reporting Guidelines'. Please confirm you have followed these guidelines.                                                                               | Not Applicable                                 |                                                                                                                                                |
| For <b>phase II and III randomized controlled trials</b> , please refer to the <b>CONSORT</b> flow diagram (see link list at top right) and submit the <b>CONSORT</b> checklist (see link list at top right) with your submission. See author guidelines, under 'Reporting Guidelines'. Please confirm you have submitted this list. | Not Applicable                                 |                                                                                                                                                |

#### Data Availability

| <b>Data availability</b>                                                                                                                                                                          | <b>Information included in the manuscript?</b> | <b>In which section is the information available?</b><br>(Reagents and Tools Table, Materials and Methods, Figures, Data Availability Section) |
|---------------------------------------------------------------------------------------------------------------------------------------------------------------------------------------------------|------------------------------------------------|------------------------------------------------------------------------------------------------------------------------------------------------|
| Have <b>primary datasets</b> been deposited according to the journal's guidelines (see 'Data Deposition' section) and the respective accession numbers provided in the Data Availability Section? | Yes                                            |                                                                                                                                                |
| Were <b>human clinical and genomic datasets</b> deposited in a public access-controlled repository in accordance to ethical obligations to the patients and to the applicable consent agreement?  | Not Applicable                                 |                                                                                                                                                |
| Are <b>computational models</b> that are central and integral to a study available without restrictions in a machine-readable form? Were the relevant accession numbers or links provided?        | Not Applicable                                 |                                                                                                                                                |
| If publicly available data were reused, provide the respective <b>data citations in the reference list</b> .                                                                                      | Not Applicable                                 |                                                                                                                                                |
